# Supplementary material for: Tasmanian devils with contagious cancer exhibit a constricted T-cell repertoire diversity
Source: PubMed Central journal article supplement (PMC6416256; doi:10.1038/s42003-019-0342-5), 2019-03-13
Supplement: 42003_2019_342_MOESM1_ESM.pdf [file 42003_2019_342_MOESM1_ESM.pdf]

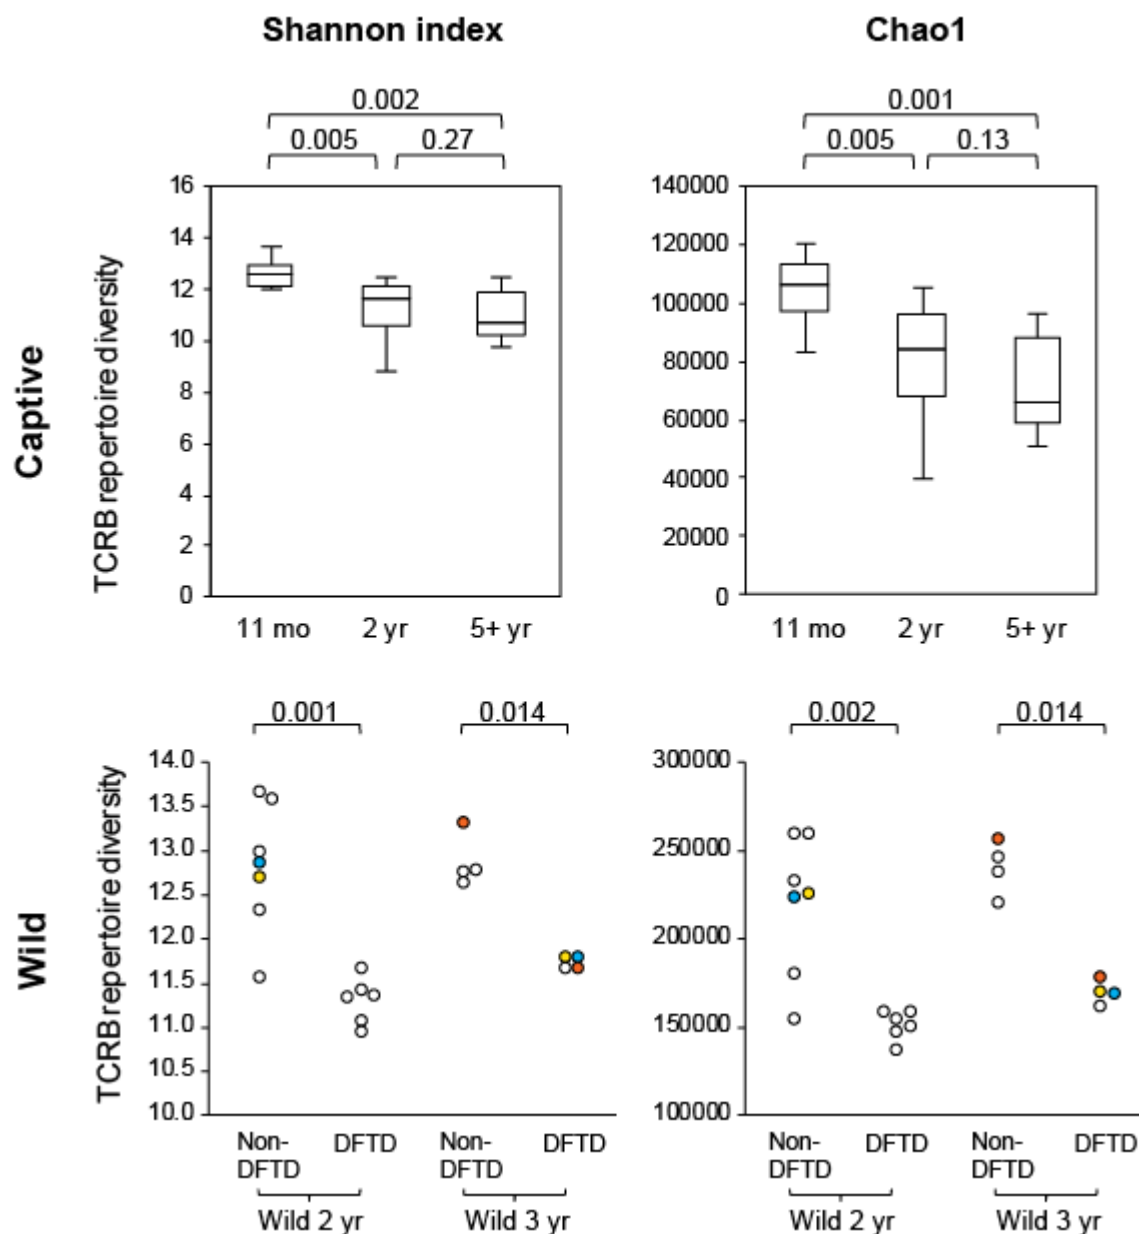

**Supplementary Figure 1** TCRB diversity estimated using Shannon index and Chao1 methods. Asterisks indicate p-value < 0.05 using Mann-Whitney U test. Box-plot elements: center line, median; box limits, first and third quartiles; whiskers, minimum and maximum ranges. Coloured data points represent three pairs of pre- and post-DFTD samples, with the same colour indicating the same animal.

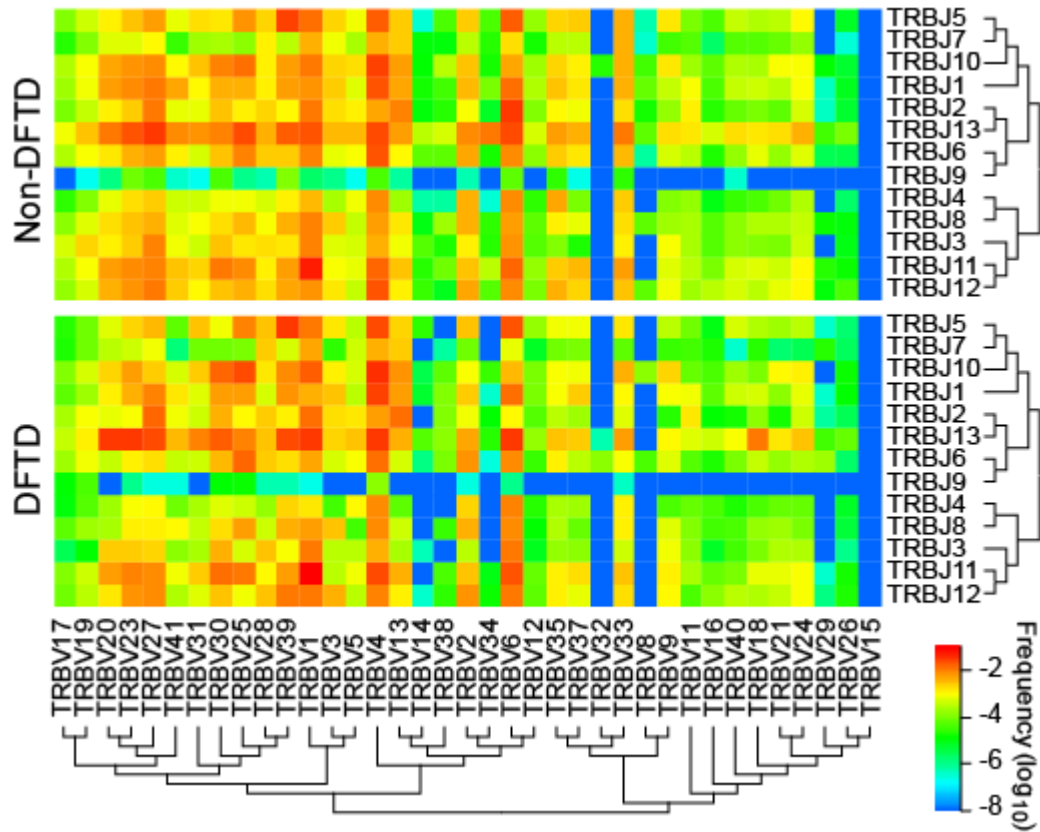

**Supplementary Figure 2** The observed frequency of VJ combinations in DFTD and non-DFTD devils. VJ combinations with observed frequency=0 were given a log10 value of -8 (blue squares). V and J segments on x and y axis, respectively, are arranged based on phylogenetic relatedness inferred by Neighbor-Joining method.

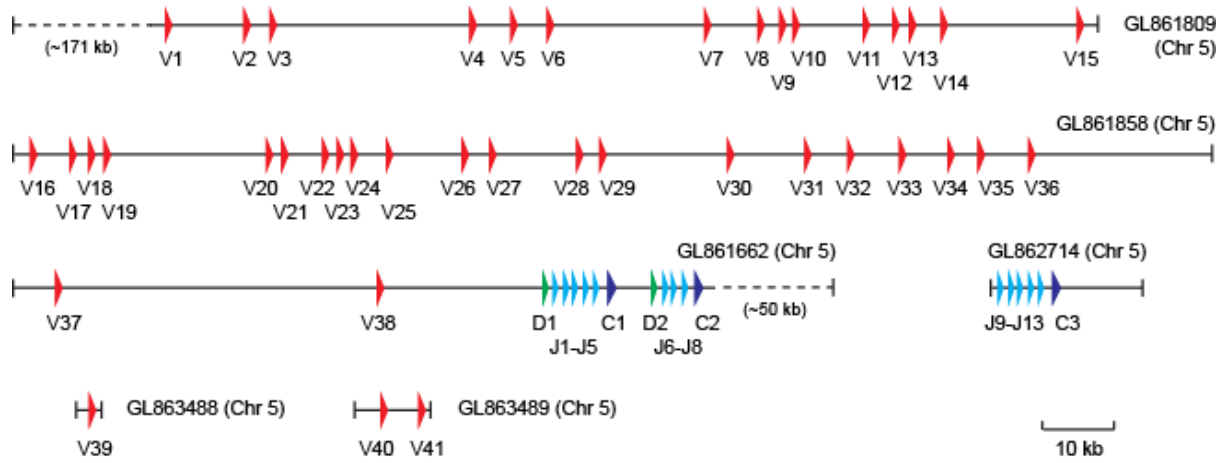

**Supplementary Figure 3** Schematic map of devil TCRB locus

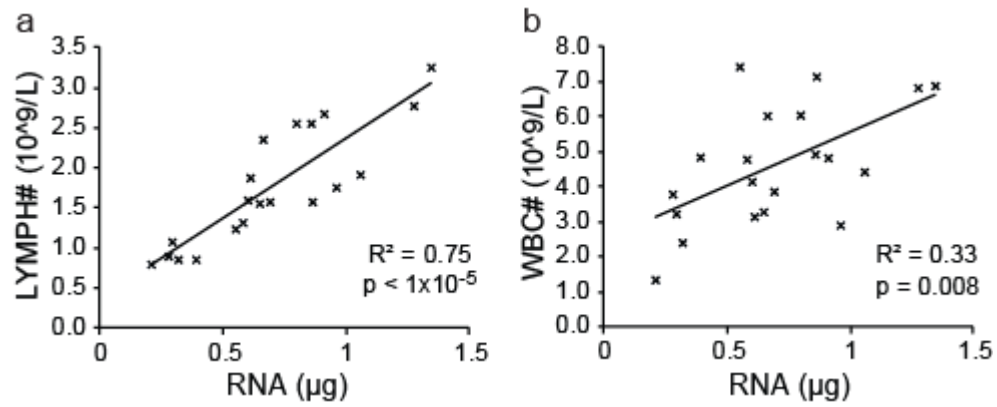

**Supplementary Figure 4** Significant correlations between the amount of RNA per 100  $\mu$ l blood and (a) lymphocyte count, and (b) white blood cell count.

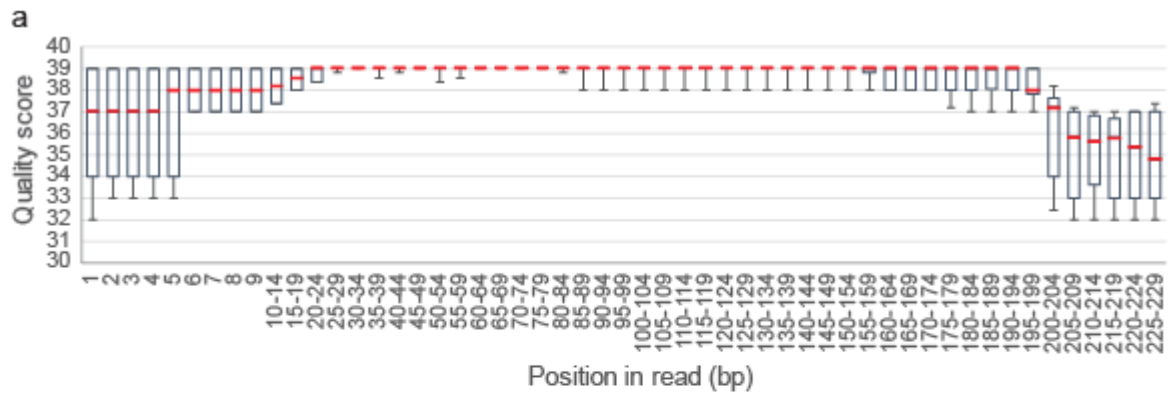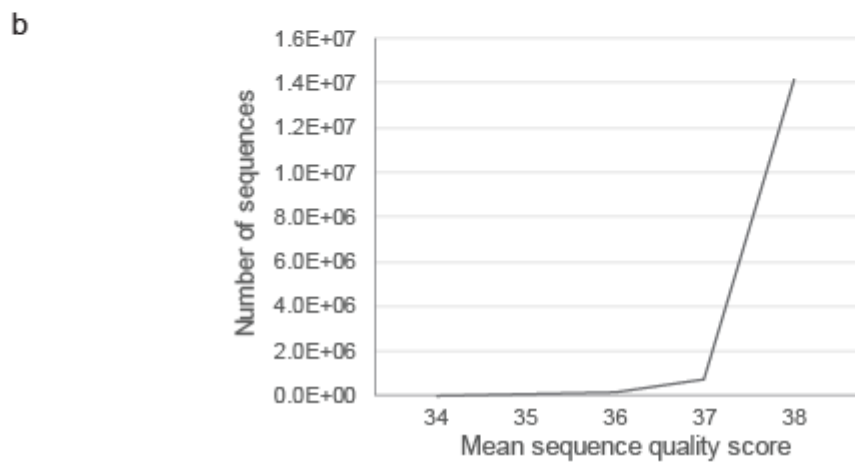

**Supplementary Figure 5** Sequence quality control (FastQC). (a) A quality score of 40 indicates 99.99% base call accuracy, and score 30 indicates 99.9% accuracy. (b) Over 98% of sequences have a mean quality score higher than 38.

**Supplementary Table 1** Sample information

| Population | Sample ID         | Age (yr)  | DFTD | RNA Integrity Number (RIN) | Number of sequences |
|------------|-------------------|-----------|------|----------------------------|---------------------|
| Captive    | DA33              | 11 months | N    | 9.4                        | 169,675             |
| Captive    | DA34              | 11 months | N    | 9.3                        | 121,502             |
| Captive    | DA35              | 11 months | N    | 9.4                        | 139,670             |
| Captive    | DA36              | 11 months | N    | 9.5                        | 88,965              |
| Captive    | DA37              | 11 months | N    | 9.5                        | 92,537              |
| Captive    | DA38              | 11 months | N    | 9.5                        | 100,928             |
| Captive    | DA39              | 11 months | N    | 9.5                        | 126,778             |
| Captive    | DA40              | 11 months | N    | 9.4                        | 191,526             |
| Captive    | DA41              | 11 months | N    | 9.1                        | 248,953             |
| Captive    | DA42              | 11 months | N    | 9.4                        | 185,303             |
| Captive    | DA8               | 2         | N    | 9.2                        | 161,614             |
| Captive    | DA9               | 2         | N    | 9.4                        | 208,319             |
| Captive    | DA13              | 2         | N    | 9.4                        | 126,406             |
| Captive    | DA14              | 2         | N    | 9.5                        | 109,230             |
| Captive    | DA15              | 2         | N    | 9.5                        | 120,794             |
| Captive    | DA16              | 2         | N    | 9                          | 145,954             |
| Captive    | DA21              | 2         | N    | 9.5                        | 151,436             |
| Captive    | DA25              | 2         | N    | 9.3                        | 74,313              |
| Captive    | DA27              | 2         | N    | 9.3                        | 196,313             |
| Captive    | DA28              | 2         | N    | 9.2                        | 314,926             |
| Captive    | DA4               | 5         | N    | 9.2                        | 169,844             |
| Captive    | DA11              | 5         | N    | 9.4                        | 135,984             |
| Captive    | DA19              | 5         | N    | 9.4                        | 124,109             |
| Captive    | DA22              | 5         | N    | 8.7                        | 140,589             |
| Captive    | DA24              | 5         | N    | 9.2                        | 145,902             |
| Captive    | DA26              | 5         | N    | 9.4                        | 64,822              |
| Captive    | DA30              | 5         | N    | 9.5                        | 153,276             |
| Captive    | DA31              | 5         | N    | 9.3                        | 230,729             |
| Captive    | DA32              | 5         | N    | 9.6                        | 162,556             |
| Captive    | DA29              | 6         | N    | 9                          | 236,091             |
| Captive    | BJ                | 7         | N    | 9                          | 225,279             |
| Captive    | Oreo              | 8         | N    | 9.5                        | 230,550             |
| Wild       | TD2               | 2         | N    | 9.5                        | 456628              |
| Wild       | TD3               | 2         | N    | 9.6                        | 446875              |
| Wild       | TD5               | 2         | N    | 9.1                        | 479442              |
| Wild       | TD6               | 2         | N    | 9.7                        | 390821              |
| Wild       | TD8               | 2         | N    | 8.7                        | 464348              |
| Wild       | TD1               | 2         | Y    | 8.5                        | 380051              |
| Wild       | TD4               | 2         | Y    | 9.7                        | 410628              |
| Wild       | TD7               | 2         | Y    | 9                          | 297690              |
| Wild       | TD19              | 2         | Y    | 8.8                        | 293995              |
| Wild       | TD20              | 2         | Y    | 9.3                        | 285501              |
| Wild       | TD21              | 2         | Y    | 8.9                        | 480643              |
| Wild       | TD9               | 3         | N    | 9.4                        | 257416              |
| Wild       | TD10              | 3         | N    | 9                          | 266266              |
| Wild       | TD11              | 3         | N    | 8.5                        | 279657              |
| Wild       | TD14              | 3         | Y    | 8.6                        | 253535              |
| Wild       | TD15 <sup>a</sup> | 2         | N    | 8.5                        | 325668              |
| Wild       | TD13 <sup>a</sup> | 3         | Y    | 9                          | 279796              |
| Wild       | TD18 <sup>b</sup> | 2         | N    | 8.9                        | 412959              |
| Wild       | TD17 <sup>b</sup> | 3         | Y    | 8.8                        | 406465              |
| Wild       | TD16 <sup>c</sup> | 3         | N    | 9                          | 263963              |
| Wild       | TD12 <sup>c</sup> | 4         | Y    | 9.4                        | 290626              |

<sup>a, b, c</sup> Paired samples, each pair from the same animal before and after catching DFTD.

**Supplementary Table 2** Annotation of TCRB gene segments in the Tasmanian devil genome

| TRB segment | Scaffold # | Orientation | Coordinates |        |
|-------------|------------|-------------|-------------|--------|
| V1          | GL861809.1 | Forward     | 170853      | 171147 |
| V2          | GL861809.1 | Forward     | 182063      | 182359 |
| V3          | GL861809.1 | Forward     | 185630      | 185902 |
| V4          | GL861809.1 | Forward     | 214310      | 214601 |
| V5          | GL861809.1 | Forward     | 220105      | 220399 |
| V6          | GL861809.1 | Forward     | 225314      | 225611 |
| V7          | GL861809.1 | Forward     | 247609      | 247885 |
| V8          | GL861809.1 | Forward     | 255171      | 255478 |
| V9          | GL861809.1 | Forward     | 258415      | 258676 |
| V10         | GL861809.1 | Forward     | 260288      | 260548 |
| V11         | GL861809.1 | Forward     | 270163      | 270466 |
| V12         | GL861809.1 | Forward     | 274594      | 274844 |
| V13         | GL861809.1 | Forward     | 276893      | 277204 |
| V14         | GL861809.1 | Forward     | 281396      | 281678 |
| V15         | GL861809.1 | Forward     | 300807      | 301079 |
| V16         | GL861858.1 | Forward     | 1422        | 1720   |
| V17         | GL861858.1 | Forward     | 7083        | 7414   |
| V18         | GL861858.1 | Forward     | 9647        | 9945   |
| V19         | GL861858.1 | Forward     | 11763       | 12054  |
| V20         | GL861858.1 | Forward     | 34945       | 35236  |
| V21         | GL861858.1 | Forward     | 37024       | 37313  |
| V22         | GL861858.1 | Forward     | 43104       | 43398  |
| V23         | GL861858.1 | Forward     | 45181       | 45512  |
| V24         | GL861858.1 | Forward     | 46940       | 47229  |
| V25         | GL861858.1 | Forward     | 52193       | 52415  |
| V26         | GL861858.1 | Forward     | 62934       | 63173  |
| V27         | GL861858.1 | Forward     | 66600       | 66891  |
| V28         | GL861858.1 | Forward     | 79076       | 79370  |
| V29         | GL861858.1 | Forward     | 82500       | 82763  |
| V30         | GL861858.1 | Forward     | 100622      | 100916 |
| V31         | GL861858.1 | Forward     | 111551      | 111845 |
| V32         | GL861858.1 | Forward     | 117900      | 118174 |
| V33         | GL861858.1 | Forward     | 125149      | 125452 |
| V34         | GL861858.1 | Forward     | 132010      | 132337 |
| V35         | GL861858.1 | Forward     | 136370      | 136664 |
| V36         | GL861858.1 | Forward     | 143681      | 143900 |
| V37         | GL861662.1 | Forward     | 6142        | 6434   |
| V38         | GL861662.1 | Forward     | 52032       | 52325  |
| D1          | GL861662.1 | Forward     | 79306       | 79317  |
| J1          | GL861662.1 | Forward     | 80095       | 80141  |
| J2          | GL861662.1 | Forward     | 80230       | 80277  |
| J3          | GL861662.1 | Forward     | 81094       | 81143  |
| J4          | GL861662.1 | Forward     | 81816       | 81864  |
| J5          | GL861662.1 | Forward     | 82723       | 82771  |
| C1          | GL861662.1 | Forward     | 84895       | 86321  |
| D2          | GL861662.1 | Forward     | 92717       | 92733  |
| J6          | GL861662.1 | Forward     | 93342       | 93388  |
| J7          | GL861662.1 | Forward     | 93620       | 93673  |
| J8          | GL861662.1 | Forward     | 94005       | 94056  |
| C2          | GL861662.1 | Forward     | 94910       | 96445  |
| J9          | GL862714.1 | Reverse     | 18888       | 18934  |
| J10         | GL862714.1 | Reverse     | 18617       | 18667  |
| J11         | GL862714.1 | Reverse     | 18428       | 18476  |
| J12         | GL862714.1 | Reverse     | 18251       | 18300  |
| J13         | GL862714.1 | Reverse     | 17857       | 17902  |
| C3          | GL862714.1 | Reverse     | 11781       | 13451  |
| V39         | GL863488.1 | Reverse     | 1733        | 2022   |
| V40         | GL863489.1 | Forward     | 3787        | 4059   |
| V41         | GL863489.1 | Forward     | 9875        | 10162  |

**Supplementary Table 3** TCRB primers

| Primer name | Primer sequence (5'-3')    | Amplified TRBV | Efficiency <sup>a</sup> |
|-------------|----------------------------|----------------|-------------------------|
| TRBV1       | GGAACTTCACTAACCAACGATCA    | V1             | 0.96                    |
| TRBV11      | CAGCTATGAGAAGGAGTTTGAT     | V11            | 1.00                    |
| TRBV12      | CCAAGCATAGATTCTCAACTGAA    | V12            | 0.96                    |
| TRBV13      | AGAGTTATTGTTTGCGAAGAGAT    | V13            | 0.98                    |
| TRBV14      | AGGCAAAGTTATTGTTCTTGAAG    | V14            | 0.97                    |
| TRBV15      | GATAATATAGAGGATGGTGACTA    | V15            | 0.98                    |
| TRBV16      | TACTCTSTGGGAAAGAATAACRCAG  | V16,V18        | 1.02                    |
| TRBV17      | CCTCCGCRATTCAAGCCTAC       | V17,V19        | 0.95                    |
| TRBV2       | CAGTTCACAGTTGTTCCAGAAT     | V2             | 0.99                    |
| TRBV20      | CCTCCCAGATTCAAGCCTAC       | V20,V23,V27    | 1.02                    |
| TRBV21      | TACTCTGTGGGAAAGGATAATACAG  | V21,V24,V40    | 1.00                    |
| TRBV25      | ACCGTTCCTCCAAGATTCAAAC     | V25,V28,V39    | 1.02                    |
| TRBV26      | GCTTGTTCTTTACTCAGTATCAAAGG | V26            | 1.01                    |
| TRBV29      | TTGTTCTTTATTCTCTGGGAAAGG   | V29            | 0.96                    |
| TRBV3       | CGCTTCAATCAGGTTCCATAA      | V3             | 0.97                    |
| TRBV30      | GACTGTTCCCTCCAAGATTTGAAC   | V30            | 0.98                    |
| TRBV31      | AATCGATTTGATCCTATATCATCAG  | V31            | 1.02                    |
| TRBV32      | GGGATATAATGTCATTCGGAAAG    | V32            | 0.99                    |
| TRBV33      | TCACACGGAAAGAAAAGGAGATA    | V33            | 0.96                    |
| TRBV34      | GGTGTGCCAAAACTCGATTC       | V34            | 1.03                    |
| TRBV35      | TAGACAAAGGAGAAGTCTCAGAT    | V35,V37        | 0.99                    |
| TRBV38      | GGGTGGATAAGTCTAGGTTTAC     | V38            | 0.97                    |
| TRBV4       | GATTCACAGCTAAGCAGGATAA     | V4             | 0.98                    |
| TRBV41      | GAGACTGTTTCTCTGCGATTC      | V41            | 0.98                    |
| TRBV5       | GCTTCAGCCCAGACTCTTC        | V5             | 0.98                    |
| TRBV6       | ATGCACAAACCTCGATTCTCA      | V6             | 1.01                    |
| TRBV8       | TAAATAGCACTCCAGACAACTTC    | V8             | 1.03                    |
| TRBV9       | CCAAAGAAAAGGACATCTCTGAA    | V9             | 0.97                    |
| TRBC_R      | AGTCACYTTTGGGGGAGTCA       |                |                         |

<sup>a</sup> Primer efficiencies analysed with real-time PCR using the same standard sample and method as described in Supplementary Methods.

**Supplementary Table 4** qPCR primers and efficiency

| <b>Gene</b>        | <b>Primer (5'-3')</b>                                       | <b>Reaction efficiency</b> | <b>Correlation coefficient of standard curve</b> |
|--------------------|-------------------------------------------------------------|----------------------------|--------------------------------------------------|
| GAPDH <sup>1</sup> | F: GACTCAACCACGTATTCGGCTC<br>R: ATATGATTCCACCCATGGCAAGTTCAA | 0.99                       | 0.999                                            |
| GUSB <sup>2</sup>  | F: CTGCTGCCTATTATTTCAAGAC<br>R: CAAGATCCAATTCAGGCTTAG       | 1.02                       | 0.997                                            |
| IL10 <sup>2</sup>  | F: GGCAGAGAATGAAACGGAGA<br>R: ACTTCACAAGGCAGGAATCTGT        | 1.00                       | 0.988                                            |
| IL6 <sup>2</sup>   | F: GCACTAAAAATGTTCCAGACTC<br>R: CACTCATTCCAGGCTCTTCAG       | 1.04                       | 0.990                                            |
| TGFB1 <sup>2</sup> | F: TATGGACATTAGTGGTGAGTG<br>R: AAGGACGGTTCTGGTTCT           | 1.03                       | 0.990                                            |
| TBX21 <sup>3</sup> | F: AGCCTCCAATAATGTGACTCAG<br>R: GTGAAGGTGTGGGTCAAAGAG       | 1.02                       | 0.993                                            |
| GATA3 <sup>3</sup> | F: CACAGGGTTCGGATGTAAGTC<br>R: CAGTACCATCTCTCCTCCACAA       | 0.97                       | 0.998                                            |
| IFNG <sup>3</sup>  | F: AGTTCTTCTGGCTGTCTTTCTC<br>R: CCCTCTTTCCAAGTCTTCATCA      | 1.02                       | 0.991                                            |
| IL4 <sup>3</sup>   | F: GTCCACGGACAGAGAAGAACTG<br>R: ATGTCTAGCACTTCCATCTCAGAG    | 0.97                       | 0.991                                            |
| FOXP3              | F: CCATGCAGGCCCATCTCTCT<br>R: GGCAGTAGCTGGCTTTCTCTGT        | 0.97                       | 0.991                                            |
| CTLA4              | F: AGCTTCACCATCCCAAGAACTG<br>R: CAAAGCTGGCAACCCCTCTG        | 0.98                       | 0.995                                            |



## Supplementary Methods

### *Annotation of devil TCRB genes*

Three TRBC genes were identified by performing BLASTN searches in the devil reference genome using opossum TRBC coding sequences (available at the IMGT database <http://www.imgt.org/>). Using predicted coding sequences of devil TRBC genes, TBLASTX searches were performed to isolate TCRB transcripts in the devil cDNA database on Ensembl (available at [http://www.ensembl.org/Sarcophilus\\_harrisii/](http://www.ensembl.org/Sarcophilus_harrisii/)). Twenty-three TCRB cDNA sequences were found, which were mapped to 21 V segments on five genome scaffolds. The recombination signal sequence (RSS) with 23-bp spacer flanking the 3' side of these V segments were extracted and aligned to generate a profile hidden Markov model using software HMMER 3.1b2, and HMM searches were carried out to further identify potential RSS associated with V elements on the TCRB scaffolds. Thirty-two more RSS were found this way, 20 of which had in-frame putative TRBV coding sequences located upstream. Using the above 41 identified V segments, a final batch of whole genome BLASTN search was performed and no further TRBV was found.

### *Sample collection*

Approximately 1 ml blood per kg body mass (no more than 5 ml in total) was sampled from each animal. Blood was collected into RNAprotect Animal Blood 500 µl Tubes (Qiagen) for RNA extraction. For cell counting, blood was collected in EDTA tubes and samples were either examined on the same day of collection or preserved with Streck Cell Preservative™, which qualitatively and quantitatively stabilises leukocyte subsets in the blood, and counted within a week.

### *PCR protocol for TCRB primers*

PCR was carried out using Platinum Taq DNA Polymerase High Fidelity Kit (Invitrogen) in a total volume of 10 µl, which contains 1 µl 10x High Fidelity PCR Buffer, 2 mM MgSO<sub>4</sub>, 0.2 mM dNTPs, 0.3 µM each primer, 1 U Platinum Taq DNA Polymerase High Fidelity, and approximately 60 ng cDNA. PCR cycling steps included 94 °C for 2 minutes; 32 cycles of 94 °C for 15 seconds, 60 °C for 30 seconds, and 72 °C for 1 minute; and 72 °C for 10 minutes.

### *Computed tomography*

The animals were fasted for 12 hours before anaesthesia was carried out by applying 5% isoflurane through a face mask placed over the nose and mouth. Anesthetized animals were then positioned on the CT table lying on their sternum with 3% isoflurane administered for maintenance of anaesthesia. All CT scans were performed using a 16-slice multi-detector CT scanner (Phillips 16 Slice, Brilliance™ CT V2.3, Phillips Medical Systems Netherlands). Both pre- and post-contrast helical scans of the entire body were acquired. Both animals received a dose of 2 ml per kg of iohexol (350 mg of iodine per mL) (Omnipaque, GE Healthcare Australia Pty Ltd), which was administered intravenously. The tube settings for the CT scan were the same for every scan: beam collimation of 16 data channels with a detector-row width of 0.75 millimeters (16 x 0.75 mm), a tube potential of 120 kVp and a tube current of 150 mA. Images were reconstructed using soft tissue and bone kernels with a slice thickness of 1mm.

### *Quantitative PCR protocols*

Real-time PCRs were carried out on a RotorGene 6000 in a total volume of 20 µl, containing 10 µl 2x Quantifast Sybr Green PCR Master Mix (Qiagen), 0.5 µM each of forward and reverse primers, and approximately 60 ng cDNA. All samples were analysed in triplicates with no-template negative controls included for each gene in each run. PCR conditions were as follows: an initial enzyme activation step of 95 °C 5 minutes; 40 cycles of two-step cycling of 95 °C for 10 seconds and 60 °C for

30 seconds; a final heating step from 50 °C to 99 °C with fluorescence signal collected every 1 °C to generate a melting curve. A composite standard containing equal parts of cDNA from eight wild samples was made and included in each run. To estimate PCR efficiencies, standard curves were generated for all genes by making five 1:3 serial dilutions of the composite standard sample; PCR efficiencies were calculated as  $-1+10^{(-1/\text{slope})}$ . The same approach and composite standard sample were used for estimating efficiencies of TCRB primers (Supplementary Table 3).

### Supplementary References

- 1 Murchison, E. P. *et al.* The Tasmanian Devil Transcriptome Reveals Schwann Cell Origins of a Clonally Transmissible Cancer. *Science* **327**, 84-87, doi:10.1126/science.1180616 (2010).
- 2 Morris, K. & Belov, K. Does the devil facial tumour produce immunosuppressive cytokines as an immune evasion strategy? *Vet Immunol Immunopathol* **153**, 159-164, doi:http://dx.doi.org/10.1016/j.vetimm.2013.02.008 (2013).
- 3 Cheng, Y. *et al.* Significant decline in anticancer immune capacity during puberty in the Tasmanian devil. *Sci Rep* **7**, 44716, doi:10.1038/srep44716 (2017).
